# Supplementary material for: Machine learning to improve interpretability of clinical, radiological and panel-based genomic data of glioma grade 4 patients undergoing surgical resection
Source: PubMed Central journal article supplement (PMC10329348; doi:10.1186/s12967-023-04308-y), 2023-07-07
Supplement: 12967_2023_4308_MOESM1_ESM.pdf [file 12967_2023_4308_MOESM1_ESM.pdf]

## **Additional information**

**Machine learning to improve interpretability of clinical, radiological and panel-based genomic data of glioma grade 4 patients undergoing surgical resection.**

## **Description**

- **Additional Methods**
- **Additional Figure Legends**
  
- **Additional Table S1**
- **Additional Table S2**
- **Additional Table S3**
- **Additional Table S4**
  
- **Additional Figure S1**
- **Additional Figure S2**
- **Additional Figure S3**

## **Additional Methods**

### **Clinical characterization of the patient cohort**

The 102 GG4 patients were enrolled in the case cohort according to the following inclusion criteria: age  $\geq 18$  years; no previous surgery; no preoperative chemo- or radiotherapy; objective evaluation of preoperative tumor volume on MRI images in DICOM format based on post-contrast T1-weighted MRI sequences and T2-weighted MRI sequences; objective estimation of EOR on post-contrast T1-weighted MRI sequences. Cases were excluded from the case cohort if one or more of the following criteria were present: incomplete imaging data, follow-up interval, and multicentric tumors. Clinical, histopathological and molecular data were collected at the time of diagnosis from medical records. Histological examination, immunohistochemistry for Ki67, analysis of the genetic status of *MGMT* promoter and *IDH1/2* genes were performed as previously described [1-5]. Regarding volumetric analysis, all pre and postoperative tumor segmentations were performed manually across all MRI slices using the OsiriX software tool [2, 6].

The achieved EOR in each case was objectively evaluated using preoperative and postoperative MRI images (DICOM format), based on the contrast area of post-contrast T1 MRI sequences, using the below formula:  $(\text{Pre-operative tumor volume} - \text{Post-operative tumor volume}) / \text{Pre-operative tumor volume}$  [2, 6].

Regarding post-operative treatment, after surgery, all patients were treated with combinations of concomitant adjuvant radiotherapy and chemotherapy, followed by adjuvant chemotherapy, as recommended by Stupp [7, 8].

### **Protein–protein interaction (PPI) Network analysis of genes with somatic mutations**

The genes name used to create the matrix were mapped by Search Tool for the Retrieval of Interacting Genes (STRING) database (version 10.5) [9], by using Cytoscape (3.8.2) [10]. The PPI network was generated based on the medium confidence score of 0.40. The pathway were selected for importance and for the biological meaning in the context of GG4.

### **Machine Learning Modeling**

EXtreme Gradient Boosting for survival (XGBoost-Surv) XGBoost modeling t was performed in Python (V3.8) using the xgboost and sklearn\_surv library partially evaluated using the scikit-learn library [11]. In each of the datasets, string-based categorical variables were converted to numerical values, and each continuous variable was standardized. To perform survival prediction in XGBoost, the survival time in the original dataset,  $t_i$ , was transformed into  $T_i$  for each patient (i) according to the censoring information, where  $C_i = 1$  if patient i was not censored and  $C_i = -1$  otherwise.

$$T_i = C_i \times t_i$$

All XGBoost models were trained using the survival Cox objective function. Additionally, for each data set, hyperparameter tuning was performed using the HyperOpt package [12], with 100 evaluation rounds in accordance with parameter ranges that have been previously used in the literature with the exception of capping the `min_child_weight` (minimum sum of instance weight), `reg_alpha` (L1 regularization term on weights), and `reg_lambda` (L2 regularization term on weights) at 10 rather 100 [13]. As the objective function for hyperparameter tuning, we computed the mean Harrell's concordance index (c-index) using the five-fold cross-validation (CV) approach [14-16]. We optimized

the parameter using HyperOpt and C-index was used as metric. Once the hyperparameters have been identified, the model was subsequently evaluated on the same total data set using five-fold CV as explained above, but with the randomly selected folds being distinct from those used in the hyperparameter tuning process to accurately assess the generalizability of the model [15].

### **Statistical analyses**

All statistical analyses were performed in R environment (v4.2). The primary endpoints was overall survival (OS). OS data were defined as time from surgery and event (death) or end of follow up (censored observation). OS data were available for all the GG4 cases entering the study. For OS analysis, all events were considered as GG4-related, i.e. all deaths were considered as events whatever the cause. OS were estimated using the Kaplan-Meier plots and comparisons between groups were made by means of log-rank test.

## References

1. Preusser M, Berghoff AS, Manzl C, Filipits M, Weinhausel A, Pulverer W, Dieckmann K, Widhalm G, Wohrer A, Knosp E, et al: **Clinical Neuropathology practice news 1-2014: pyrosequencing meets clinical and analytical performance criteria for routine testing of MGMT promoter methylation status in glioblastoma.** *Clin Neuropathol* 2014, **33**:6-14.
2. Ius T, Pignotti F, Della Pepa GM, Bagatto D, Isola M, Battistella C, Gaudino S, Pegolo E, Chiesa S, Arcicasa M, et al: **Glioblastoma: from volumetric analysis to molecular predictors.** *J Neurosurg Sci* 2022, **66**:173-186.
3. Ius T, Sabatino G, Panciani PP, Fontanella MM, Ruda R, Castellano A, Barbagallo GMV, Belotti F, Boccaletti R, Catapano G, et al: **Surgical management of Glioma Grade 4: technical update from the neuro-oncology section of the Italian Society of Neurosurgery (SINch(R)): a systematic review.** *J Neurooncol* 2023.
4. Louis DN, Perry A, Reifenberger G, von Deimling A, Figarella-Branger D, Cavenee WK, Ohgaki H, Wiestler OD, Kleihues P, Ellison DW: **The 2016 World Health Organization Classification of Tumors of the Central Nervous System: a summary.** *Acta Neuropathol* 2016, **131**:803-820.
5. Louis DN, Perry A, Wesseling P, Brat DJ, Cree IA, Figarella-Branger D, Hawkins C, Ng HK, Pfister SM, Reifenberger G, et al: **The 2021 WHO Classification of Tumors of the Central Nervous System: a summary.** *Neuro Oncol* 2021, **23**:1231-1251.
6. Ius T, Angelini E, Thiebaut de Schotten M, Mandonnet E, Duffau H: **Evidence for potentials and limitations of brain plasticity using an atlas of functional resectability of WHO grade II gliomas: towards a "minimal common brain".** *Neuroimage* 2011, **56**:992-1000.
7. Stupp R, Hegi ME, Mason WP, van den Bent MJ, Taphoorn MJ, Janzer RC, Ludwin SK, Allgeier A, Fisher B, Belanger K, et al: **Effects of radiotherapy with concomitant and**

- adjuvant temozolomide versus radiotherapy alone on survival in glioblastoma in a randomised phase III study: 5-year analysis of the EORTC-NCIC trial.** *Lancet Oncol* 2009, **10**:459-466.
8. Stupp R, Mason WP, van den Bent MJ, Weller M, Fisher B, Taphoorn MJ, Belanger K, Brandes AA, Marosi C, Bogdahn U, et al: **Radiotherapy plus concomitant and adjuvant temozolomide for glioblastoma.** *N Engl J Med* 2005, **352**:987-996.
  9. Szklarczyk D, Franceschini A, Wyder S, Forslund K, Heller D, Huerta-Cepas J, Simonovic M, Roth A, Santos A, Tsafou KP, et al: **STRING v10: protein-protein interaction networks, integrated over the tree of life.** *Nucleic Acids Res* 2015, **43**:D447-452.
  10. Shannon P, Markiel A, Ozier O, Baliga NS, Wang JT, Ramage D, Amin N, Schwikowski B, Ideker T: **Cytoscape: a software environment for integrated models of biomolecular interaction networks.** *Genome Res* 2003, **13**:2498-2504.
  11. Pedregosa F, Varoquaux G, Gramfort A, Michel V, Thirion B, Grisel O, Blondel M, Prettenhofer P, Weiss R, Dubourg V, et al: **Scikit-learn: Machine Learning in Python.** *Journal of Machine Learning Research* 2011, **12**:2825-2830.
  12. Bergstra J, Yamins D, Cox D: **Making a Science of Model Search: Hyperparameter Optimization in Hundreds of Dimensions for Vision Architectures.** In *Proceedings of the 30th International Conference on Machine Learning* (Sanjoy D, David M eds.), vol. 28. pp. 115--123. Proceedings of Machine Learning Research: PMLR; 2013:115--123.
  13. Jansen T, Geleijnse G, Van Maaren M, Hendriks MP, Ten Teije A, Moncada-Torres A: **Machine Learning Explainability in Breast Cancer Survival.** *Stud Health Technol Inform* 2020, **270**:307-311.

14. Polano M, Chierici M, Dal Bo M, Gentilini D, Di Cintio F, Baboci L, Gibbs DL, Furlanello C, Toffoli G: **A Pan-Cancer Approach to Predict Responsiveness to Immune Checkpoint Inhibitors by Machine Learning.** *Cancers (Basel)* 2019, **11**.
15. Moncada-Torres A, van Maaren MC, Hendriks MP, Siesling S, Geleijnse G: **Explainable machine learning can outperform Cox regression predictions and provide insights in breast cancer survival.** *Sci Rep* 2021, **11**:6968.
16. Polano M, Fabbiani E, Adreuzzi E, Cintio FD, Bedon L, Gentilini D, Mongiat M, Ius T, Arcicasa M, Skrap M, et al: **A New Epigenetic Model to Stratify Glioma Patients According to Their Immunosuppressive State.** *Cells* 2021, **10**.

## Additional figure legends

### **Figure S1. Distribution and classification of the gene alterations found in the 102 sequenced GG4 cases.**

A) Distribution of the type of alterations (e.g. missense mutations, nonsense mutations, deletions, amplifications, multihits, complex events) and frequencies for the 20 genes most frequently found altered are shown. The number of sequenced cases found altered for each gene is also shown.

### **Figure S2. ML model obtained by considering somatic mutations involving genes belonging to the PI3K-AKT-mTOR signaling pathway (WP3844).**

A) Feature importance ranked by the "mean absolute magnitude" of the SHAP values of the model obtained for the 71 GG4 cases with available TMB values using a dataset (dataset 4) that included 27 features constituted by 16 genes, 10 clinical and surgical variables and the biomarker TMB. This selection was chosen in order to circumscribe the ML approach to the genes belonging to the PI3K-AKT-mTOR signaling pathway (WP3844). Upper panel: mean absolute values corresponding to the magnitude of feature importance. Lower panel: summary plots for SHAP values; for each considered feature, a single patient is represented by one point. Along the x axis the position of a point corresponds to the logarithm of the mortality risk associated with that feature for a specific patients. This value corresponds to the impact that the feature had on the model output for that specific patient. Along the y axis, the different features are disposed according to their importance corresponding to the mean of their absolute SHAP values. Features with the higher importance are disposed on the upper part of the summary plots. Data clusters with SHAP values around zero indicate low impact on the model. SHAP, Shapley Additive exPlanation. B) Circulating barplot recapitulating the contribution in predicting OS of clinical/surgical parameters, TMB values and somatic gene mutations included in the model.



**Figure S3. Impact of TMB on survival in the TCGA high grade glioma series.** Kaplan-Meier curves comparing the OS intervals of cases with high TMB ( $TMB \geq 1.7$ , red line) and cases with low TMB ( $TMB < 1.7$ , blu line). The p-value reported refers to the log-rank test.

**Table S1. Clinical characterization of the GG4 cohort (102 cases).**

| <b>Characteristic</b>              | <b>number of cases (102)</b> |
|------------------------------------|------------------------------|
| CW treatment, n (%)                |                              |
| 0; not-treated                     | 63 (62%)                     |
| 1; treated                         | 39 (38%)                     |
| Age, Median (IQR)                  | 60 (52 – 69)                 |
| EOR, Median (IQR)                  | 98% (95% – 100%)             |
| Localization, n (%)                |                              |
| 0; precentral                      | 41 (40%)                     |
| 1; postcentral                     | 21 (21%)                     |
| 2; temporoinsular                  | 40 (39%)                     |
| Ki67, Median (IQR)                 | 40 (24 – 60)                 |
| <i>IDH</i> mutated status, n (%)   |                              |
| 0; unmutated                       | 94 (92.2%)                   |
| 1; mutated                         | 8 (7.8%)                     |
| side, n (%)                        |                              |
| 0; left                            | 54 (53%)                     |
| 1; right                           | 48 (47%)                     |
| Pre-operative volume, Median (IQR) | 32 (19 – 46)                 |
| Residual volume, Median (IQR)      | 0.14 (0.00 – 1.65)           |

|                                        |          |
|----------------------------------------|----------|
| Extent of resection_2categories, n (%) |          |
| 0; $\leq 99\%$                         | 52 (51%) |
| 1; $\geq 100\%$                        | 50 (49%) |
| <i>MGMT</i> status, n (%)              |          |
| 0; unmethylated                        | 40 (39%) |
| 1; methylated                          | 62 (61%) |

Abbreviations: IQR, interquartile range; CW, carmustine wafer; EOR, extent of resection.

**Table S2. Categorization of variables in datasets.**

| <b>Category</b>                | <b>Category name</b> | <b>Variable name</b>                                                                                                                                  |
|--------------------------------|----------------------|-------------------------------------------------------------------------------------------------------------------------------------------------------|
| <b>Radiological variables</b>  | Clinical             | Extent of Resection (EOR), residual volume, preoperative volume.                                                                                      |
| <b>Clinical variables</b>      | Clinical             | Age at diagnosis, side, localization, <i>IDH</i> mutational status, <i>MGMT</i> promoter methylation status, gender, carmustine wafer (CW) treatment. |
| <b>Mutation Status</b>         | Molecular            | Somatic mutations in genes present in the TSO500 Illumina.                                                                                            |
| <b>Amplification</b>           | Molecular            | Amplification reported in genes of TSO500 Illumina.                                                                                                   |
| <b>Tumor Mutational Burden</b> | TMB                  | Tumor Mutational Burden.                                                                                                                              |

**Table S3.**

**Dataset name and composition of the datasets used with the relative reported metrics from xgboost analysis.**

| <b>Dataset</b>   | <b>Number Cases</b> | <b>Dataset Composition</b>                                                         | <b>Count</b> | <b>C-index test</b> | <b>C-index CV (CI)</b> |
|------------------|---------------------|------------------------------------------------------------------------------------|--------------|---------------------|------------------------|
| <b>Dataset 1</b> | 102                 | 417 gene mutations, 45 gene amplifications, 12 clinical and radiological variables | 474          | 0.540               | 0.696<br>(0.655-0.754) |
| <b>Dataset 2</b> | 102                 | 95 gene mutations, 12 clinical and radiological variables                          | 107          | 0.682               | 0.674<br>(0.610-0.734) |
| <b>Dataset 3</b> | 71                  | 95 gene mutations, 12 clinical and radiological variables, TMB                     | 108          | 0.625               | 0.646<br>(0.619-0.674) |
| <b>Dataset 4</b> | 71                  | 16 gene mutations, 10 clinical and radiological variables, TMB                     | 27           | 0.670               | 0.657<br>(0.577-0.746) |

Abbreviations: CI, confidence interval; TMB, tumor mutational burden.

**Table S4. Detailed lists of clinical/surgical variables and gene alterations composing datasets employed for the xgboost analysis.**

| Dataset 1 (102 GG4 cases) | Dataset 2 (102 GG4 cases) | Dataset 3 (71 GG4 cases) | Dataset 4 (71 GG4 cases)        |
|---------------------------|---------------------------|--------------------------|---------------------------------|
| ABRAXAS1                  | ALK                       | ALK                      | ATM                             |
| ACVR1                     | ANKRD11                   | ANKRD11                  | BRAF                            |
| ACVR1B                    | ARID1B                    | ARID1B                   | BRCA2                           |
| ADGRA2                    | ARID2                     | ARID2                    | CBL                             |
| AKT1                      | ATM                       | ATM                      | EGFR                            |
| AKT2                      | ATR                       | ATR                      | MET                             |
| ALK                       | ATRX                      | ATRX                     | MSH6                            |
| ALOX12B                   | AXIN2                     | AXIN2                    | NF1                             |
| AMER1                     | AXL                       | AXL                      | PIK3C2G                         |
| ANKRD11                   | BCL6                      | BCL6                     | PIK3CA                          |
| ANKRD26                   | BLM                       | BLM                      | PIK3R1                          |
| APC                       | BRAF                      | BRAF                     | PLCG2                           |
| AR                        | BRCA2                     | BRCA2                    | PTEN                            |
| ARAF                      | BRD4                      | BRD4                     | RB1                             |
| ARFRP1                    | BRIP1                     | BRIP1                    | TP53                            |
| ARID1A                    | CARD11                    | CARD11                   | TSC2                            |
| ARID1B                    | CBL                       | CBL                      | CW treatment                    |
| ARID2                     | CDK12                     | CDK12                    | IDH mutated status              |
| ARID5B                    | CREBBP                    | CREBBP                   | MGMT promoter methylated status |
| ASXL1                     | CSF1R                     | CSF1R                    | Gender_female                   |
| ASXL2                     | CUX1                      | CUX1                     | Age                             |
| ATM                       | DICER1                    | DICER1                   | Localization                    |
| ATR                       | DNMT3A                    | DNMT3A                   | side                            |
| ATRX                      | DNMT3B                    | DNMT3B                   | Ki67                            |
| AURKA                     | EGFR                      | EGFR                     | Pre-operative volume            |
| AURKB                     | EPHA3                     | EPHA3                    | Residual volume                 |
| AXIN1                     | EPHA5                     | EPHA5                    | TMB                             |
| AXIN2                     | EPHB1                     | EPHB1                    |                                 |
| AXL                       | ERCC2                     | ERCC2                    |                                 |
| B2M                       | ERCC3                     | ERCC3                    |                                 |
| BAP1                      | ERCC4                     | ERCC4                    |                                 |
| BARD1                     | FANCA                     | FANCA                    |                                 |
| BBC3                      | FANCD2                    | FANCD2                   |                                 |
| BCL10                     | FAT1                      | FAT1                     |                                 |
| BCL2L11                   | FGFR4                     | FGFR4                    |                                 |
| BCL2L2                    | GABRA6                    | GABRA6                   |                                 |
| BCL6                      | GEN1                      | GEN1                     |                                 |
| BCOR                      | GNAS                      | GNAS                     |                                 |
| BCORL1                    | GRIN2A                    | GRIN2A                   |                                 |
| BCR                       | IDH1                      | IDH1                     |                                 |
| BIRC3                     | INSR                      | INSR                     |                                 |
| BLM                       | JAK2                      | JAK2                     |                                 |
| BMPR1A                    | KDM5A                     | KDM5A                    |                                 |
| BRAF                      | LATS1                     | LATS1                    |                                 |
| BRCA1                     | LRP1B                     | LRP1B                    |                                 |
| BRCA2                     | LZTR1                     | LZTR1                    |                                 |
| BRD4                      | MAP3K1                    | MAP3K1                   |                                 |
| BRIP1                     | MDC1                      | MDC1                     |                                 |
| CALR                      | MED12                     | MED12                    |                                 |
| CARD11                    | MET                       | MET                      |                                 |
| CASP8                     | MGA                       | MGA                      |                                 |
| CBL                       | MSH3                      | MSH3                     |                                 |
| CCND3                     | MSH6                      | MSH6                     |                                 |
| CCNE1                     | MST1                      | MST1                     |                                 |
| CD274                     | MST1R                     | MST1R                    |                                 |
| CD276                     | MTOR                      | MTOR                     |                                 |
| CD74                      | NCOR1                     | NCOR1                    |                                 |
| CD79A                     | NF1                       | NF1                      |                                 |
| CDH1                      | NFE2L2                    | NFE2L2                   |                                 |
| CDK12                     | NOTCH1                    | NOTCH1                   |                                 |
| CDK4                      | NOTCH2                    | NOTCH2                   |                                 |
| CDK6                      | NOTCH3                    | NOTCH3                   |                                 |
| CDKN1A                    | NOTCH4                    | NOTCH4                   |                                 |
| CDKN1B                    | NTRK1                     | NTRK1                    |                                 |
| CDKN2A                    | NUP93                     | NUP93                    |                                 |
| CDKN2C                    | NUTM1                     | NUTM1                    |                                 |
| CEBPA                     | PBRM1                     | PBRM1                    |                                 |
| CHD2                      | PIK3C2G                   | PIK3C2G                  |                                 |

|        |                                    |                                    |
|--------|------------------------------------|------------------------------------|
| CHD4   | PIK3CA                             | PIK3CA                             |
| CHEK1  | PIK3R1                             | PIK3R1                             |
| CHEK2  | PLCG2                              | PLCG2                              |
| CIC    | POLD1                              | POLD1                              |
| COP1   | POLE                               | POLE                               |
| CREBBP | PTCH1                              | PTCH1                              |
| CRLF2  | PTEN                               | PTEN                               |
| CSF1R  | PTPN11                             | PTPN11                             |
| CSF3R  | PTPRT                              | PTPRT                              |
| CTLA4  | RANBP2                             | RANBP2                             |
| CTNNA1 | RB1                                | RB1                                |
| CUL3   | ROS1                               | ROS1                               |
| CUX1   | RPTOR                              | RPTOR                              |
| CXCR4  | SDHA                               | SDHA                               |
| CYLD   | SETBP1                             | SETBP1                             |
| DAXX   | SETD2                              | SETD2                              |
| DDR2   | SLIT2                              | SLIT2                              |
| DHX15  | SLX4                               | SLX4                               |
| DICER1 | SPEN                               | SPEN                               |
| DIS3   | SPTA1                              | SPTA1                              |
| DNAJB1 | TCF3                               | TCF3                               |
| DNMT1  | TET1                               | TET1                               |
| DNMT3A | TET2                               | TET2                               |
| DNMT3B | TP53                               | TP53                               |
| DOT1L  | TSC2                               | TSC2                               |
| E2F3   | ZFHX3                              | ZFHX3                              |
| EGFL7  | ZNF217                             | ZNF217                             |
| EGFR   | CW treatment                       | CW treatment                       |
| EIF4A2 | Extent Of Resection _ 2 categories | Extent Of Resection _ 2 categories |
| EIF4E  | IDH mutated status                 | IDH mutated status                 |
| EML4   | MGMT promoter methylated status    | MGMT promoter methylated status    |
| EMSY   | Gender_female                      | Gender_female                      |
| EP300  | Age                                | Age                                |
| EPCAM  | Localization                       | Localization                       |
| EPHA3  | side                               | side                               |
| EPHA5  | Ki67                               | Ki67                               |
| EPHA7  | EOR                                | EOR                                |
| EPHB1  | Preoperative volume                | Pre-operative volume               |
| ERBB2  | Residual volume                    | Residual volume                    |
| ERBB3  |                                    | TMB                                |
| ERBB4  |                                    |                                    |
| ERCC1  |                                    |                                    |
| ERCC2  |                                    |                                    |
| ERCC3  |                                    |                                    |
| ERCC4  |                                    |                                    |
| ERCC5  |                                    |                                    |
| ERG    |                                    |                                    |
| ERRFI1 |                                    |                                    |
| ESR1   |                                    |                                    |
| ETS1   |                                    |                                    |
| ETV1   |                                    |                                    |
| ETV4   |                                    |                                    |
| ETV5   |                                    |                                    |
| ETV6   |                                    |                                    |
| EWSR1  |                                    |                                    |
| EZH2   |                                    |                                    |
| FAM46C |                                    |                                    |
| FANCA  |                                    |                                    |
| FANCC  |                                    |                                    |
| FANCD2 |                                    |                                    |
| FANCE  |                                    |                                    |
| FANCF  |                                    |                                    |
| FANCG  |                                    |                                    |
| FANCI  |                                    |                                    |
| FANCL  |                                    |                                    |
| FAS    |                                    |                                    |
| FAT1   |                                    |                                    |
| FBXW7  |                                    |                                    |
| FGF1   |                                    |                                    |
| FGF10  |                                    |                                    |
| FGF23  |                                    |                                    |
| FGF3   |                                    |                                    |

FGF4  
FGF5  
FGF6  
FGF8  
FGFR1  
FGFR2  
FGFR3  
FGFR4  
FLCN  
FLI1  
FLT1  
FLT3  
FLT4  
FOXA1  
FOXP1  
FRS2  
FYN  
GABRA6  
GATA1  
GATA2  
GATA3  
GATA4  
GATA6  
GEN1  
GLI1  
GNAS  
GREM1  
GRIN2A  
GRM3  
H3F3A  
H3F3C  
HGF  
HIST1H1C  
HIST1H2BD  
HIST1H3B  
HIST1H3J  
HIST3H3  
HNF1A  
HOXB13  
HRAS  
HSD3B1  
HSP90AA1  
ICOSLG  
ID3  
IDH1  
IDH2  
IFNGR1  
IGF1R  
IGF2  
IKBKE  
IKZF1  
IL7R  
INHA  
INHBA  
INPP4A  
INPP4B  
INSR  
IRF2  
IRS1  
IRS2  
JAK1  
JAK2  
JAK3  
JUN  
KAT6A  
KDM5A  
KDM5C  
KDM6A  
KDR  
KEAP1  
KEL  
KIF5B



KIT  
KLF4  
KLHL6  
KMT2A  
KRAS  
LATS1  
LATS2  
LRP1B  
LZTR1  
MAGI2  
MAP2K1  
MAP2K2  
MAP3K1  
MAP3K13  
MAP3K14  
MAP3K4  
MAPK3  
MCL1  
MDC1  
MDM2  
MDM4  
MED12  
MEN1  
MET  
MGA  
MITF  
MLH1  
MPL  
MRE11  
MSH2  
MSH3  
MSH6  
MST1  
MST1R  
MTOR  
MUTYH  
MYB  
MYC  
MYCL  
MYD88  
MYOD1  
NAB2  
NBN  
NCOA3  
NCOR1  
NEGR1  
NF1  
NF2  
NFE2L2  
NKX2-1  
NKX3-1  
NOTCH1  
NOTCH2  
NOTCH3  
NOTCH4  
NRG1  
NSD1  
NTRK1  
NTRK3  
NUP93  
NUTM1  
PAK1  
PAK5  
PALB2  
PARP1  
PAX3  
PAX5  
PAX7  
PAX8  
PBRM1  
PDCD1  
PDCD1LG2

PDGFRA  
PDGFRB  
PDPK1  
PGR  
PHF6  
PIK3C2B  
PIK3C2G  
PIK3C3  
PIK3CA  
PIK3CB  
PIK3CD  
PIK3CG  
PIK3R1  
PIK3R2  
PIK3R3  
PIM1  
PLCG2  
PLK2  
PMAIP1  
PMS1  
PMS2  
PNRC1  
POLD1  
POLE  
PPARG  
PPM1D  
PPP2R1A  
PPP2R2A  
PPP6C  
PRDM1  
PREX2  
PRKAR1A  
PRKDC  
PRKN  
PTCH1  
PTEN  
PTPN11  
PTPRD  
PTPRS  
PTPRT  
RAD50  
RAD51  
RAD51B  
RAD51C  
RAD51D  
RAD52  
RAD54L  
RAF1  
RANBP2  
RASA1  
RB1  
RBM10  
RECQL4  
REL  
RET  
RICTOR  
RIT1  
RNF43  
ROS1  
RPS6KB1  
RPS6KB2  
RPTOR  
RUNX1  
RUNX1T1  
SDHA  
SDHB  
SDHC  
SDHD  
SETBP1  
SETD2  
SF3B1  
SH2B3

SHQ1  
SLIT2  
SLX4  
SMAD3  
SMAD4  
SMARCA4  
SMARCD1  
SMC3  
SMO  
SNCAIP  
SOCS1  
SOX17  
SOX2  
SOX9  
SPEN  
SPOP  
SPTA1  
SRC  
STAG1  
STAG2  
STAT5A  
STAT5B  
STK11  
STK40  
SUZ12  
SYK  
TAF1  
TBX3  
TCF3  
TCF7L2  
TET1  
TET2  
TFRC  
TGFBR2  
TMEM127  
TMPRSS2  
TNFAIP3  
TNFRSF14  
TOP2A  
TP53  
TP63  
TRAF2  
TRAF7  
TSC1  
TSC2  
TSHR  
VEGFA  
VHL  
VTCN1  
WISP3  
WT1  
XIAP  
XRCC2  
YES1  
ZBTB2  
ZFHX3  
ZNF217  
ZNF703  
ZRSR2  
ampl:::AKT2  
ampl:::ALK  
ampl:::AR  
ampl:::BRAF  
ampl:::BRCA1  
ampl:::BRCA2  
ampl:::CCND1  
ampl:::CCND3  
ampl:::CCNE1  
ampl:::CDK4  
ampl:::CDK6  
ampl:::CHEK2  
ampl:::EGFR

ampl::ERBB3  
ampl::ERCC1  
ampl::ERCC2  
ampl::FGF1  
ampl::FGF10  
ampl::FGF14  
ampl::FGF19  
ampl::FGF2  
ampl::FGF23  
ampl::FGF3  
ampl::FGF4  
ampl::FGF6  
ampl::FGF7  
ampl::FGFR1  
ampl::KIT  
ampl::KRAS  
ampl::LAMP1  
ampl::MDM2  
ampl::MDM4  
ampl::MET  
ampl::MYC  
ampl::MYCL  
ampl::MYCN  
ampl::NRAS  
ampl::PDGFRA  
ampl::PDGFRB  
ampl::PIK3CA  
ampl::PIK3CB  
ampl::RAF1  
ampl::RET  
ampl::RICTOR  
ampl::RPS6KB1  
CW treatment  
Extent Of Resection \_2 categories  
IDH mutated status  
MGMT promoter methylated status  
Gender\_female  
Age  
Localization  
side  
Ki67  
EOR  
Preoperative volume  
Residual volume

Abbreviations: CW, carmustine wafer; EOR, extent of resection; TMB, tumor mutational burden.

Altered in 99 (97.06%) of 102 cases

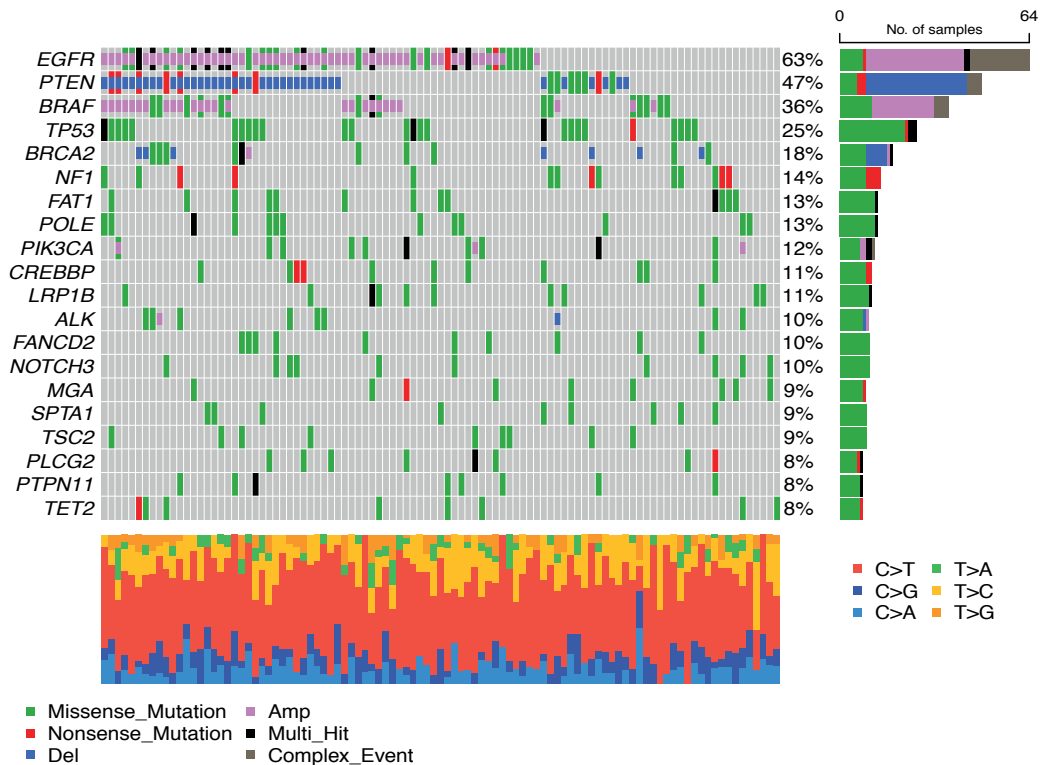

FIGURE S1

A

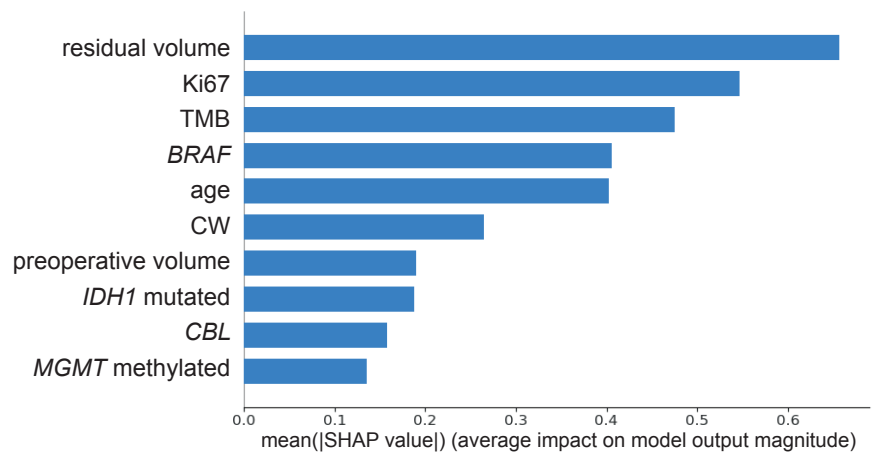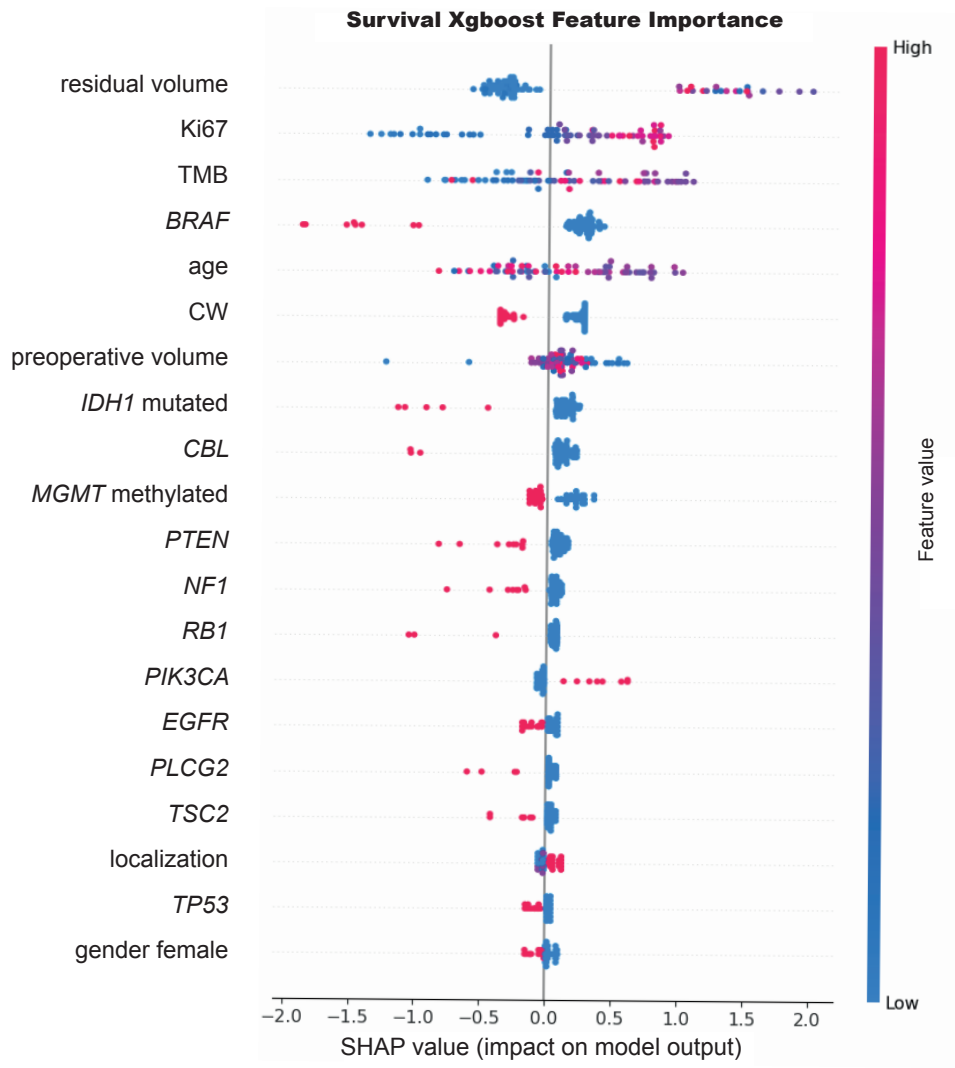

B

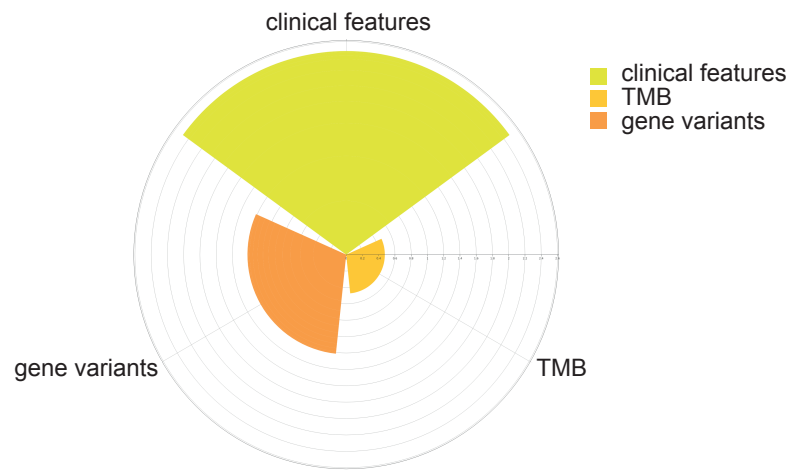

FIGURE S2

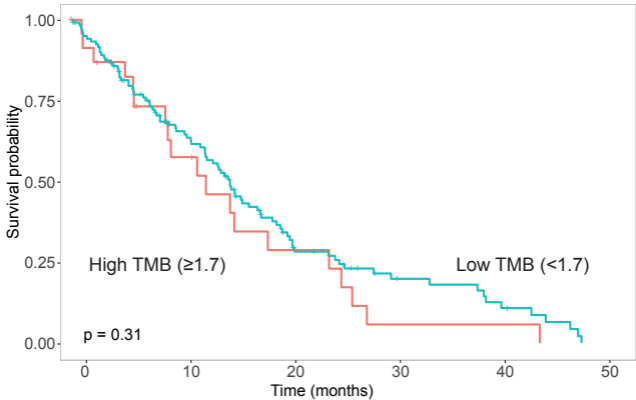

FIGURE S3
